# Supplementary material for: Levels of toxic arsenic species in native terrestrial plants from soils polluted by former mining activities
Source: Royal Society of Chemistry journal article supplement (doi:10.1039/c3em00624g), 2014-01-01
Supplement: c3em00624g1.pdf [file c3em00624g1.pdf]

1 Table S1

- 2 Design matrix and response values obtained from the factorial design development to  
3 assess the extraction percentage with deionized water for the root of *T. zygis* by MAE.

| Run number | Levels      |      |                  | Total As extracted (%) <sup>a</sup> |
|------------|-------------|------|------------------|-------------------------------------|
|            | Temperature | Time | Extraction steps |                                     |
| 1          | 0           | 0    | 0                | 13.4                                |
| 2          | -           | +    | +                | 13.7                                |
| 3          | +           | -    | -                | 21.2                                |
| 4          | 0           | 0    | 0                | 16.6                                |
| 5          | +           | -    | +                | 27.3                                |
| 6          | -           | -    | -                | 14.0                                |
| 7          | -           | -    | +                | 13.3                                |
| 8          | +           | +    | -                | 19.0                                |
| 9          | 0           | 0    | 0                | 13.0                                |
| 10         | -           | +    | -                | 8.90                                |
| 11         | +           | +    | +                | 31.4                                |
| 12         | 0           | 0    | 0                | 15.4                                |

- 4 <sup>a</sup>Calculated as the ratio between the total As extracted concentration and the total As  
5 in digested samples ((164 ± 3) µg g<sup>-1</sup>).<sup>22</sup>

6 Table S2

7 Analysis of variance (ANOVA) of the results obtained for the extraction recovery with  
 8 deionized water by MAE, corresponding to the root of *T. zygis*, obtained for the Box-  
 9 Behnken design.

| Source             | Sum of squares | DF <sup>a</sup> | Mean square | F value | p-value       |
|--------------------|----------------|-----------------|-------------|---------|---------------|
| <b>A</b>           | 297.68         | 1               | 297.68      | 163.30  | <b>0.0000</b> |
| <b>B</b>           | 4.06125        | 1               | 4.06125     | 2.23    | 0.1861        |
| <b>C</b>           | 90.4513        | 1               | 90.4513     | 49.62   | <b>0.0004</b> |
| <b>AA</b>          | 24.01          | 1               | 24.01       | 13.17   | <b>0.0110</b> |
| <b>AB</b>          | 7.0225         | 1               | 7.0225      | 3.85    | 0.0973        |
| <b>AC</b>          | 19.8025        | 1               | 19.8025     | 10.86   | <b>0.0165</b> |
| <b>BB</b>          | 3.8025         | 1               | 3.8025      | 2.09    | 0.1988        |
| <b>BC</b>          | 1.0            | 1               | 1.0         | 0.55    | 0.4869        |
| <b>CC</b>          | 9.3025         | 1               | 9.3025      | 5.10    | 0.0646        |
| <b>Total error</b> | 10.9375        | 6               | 1.82292     |         |               |
| <b>Total</b>       | 468.07         | 15              |             |         |               |

10 <sup>a</sup> DF = Degrees of freedom

11 Figure S1

12 Response surfaces estimated from Box-Behnken design for total arsenic extraction

13 recovery (%) by MAE method on the root of *T. zygis*, when the temperature (A), time

14 (B) and extraction steps (C) are constant at optimum value.

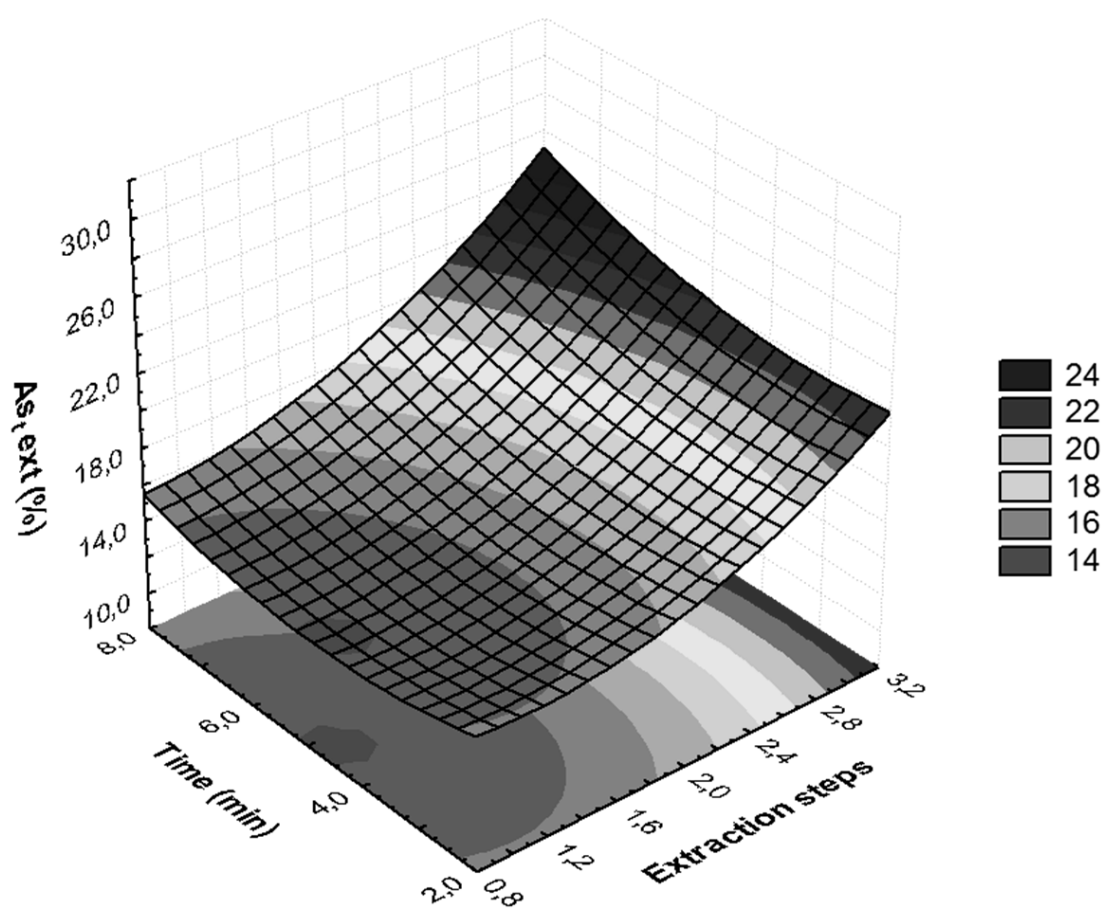

15  
16

Figure S1A

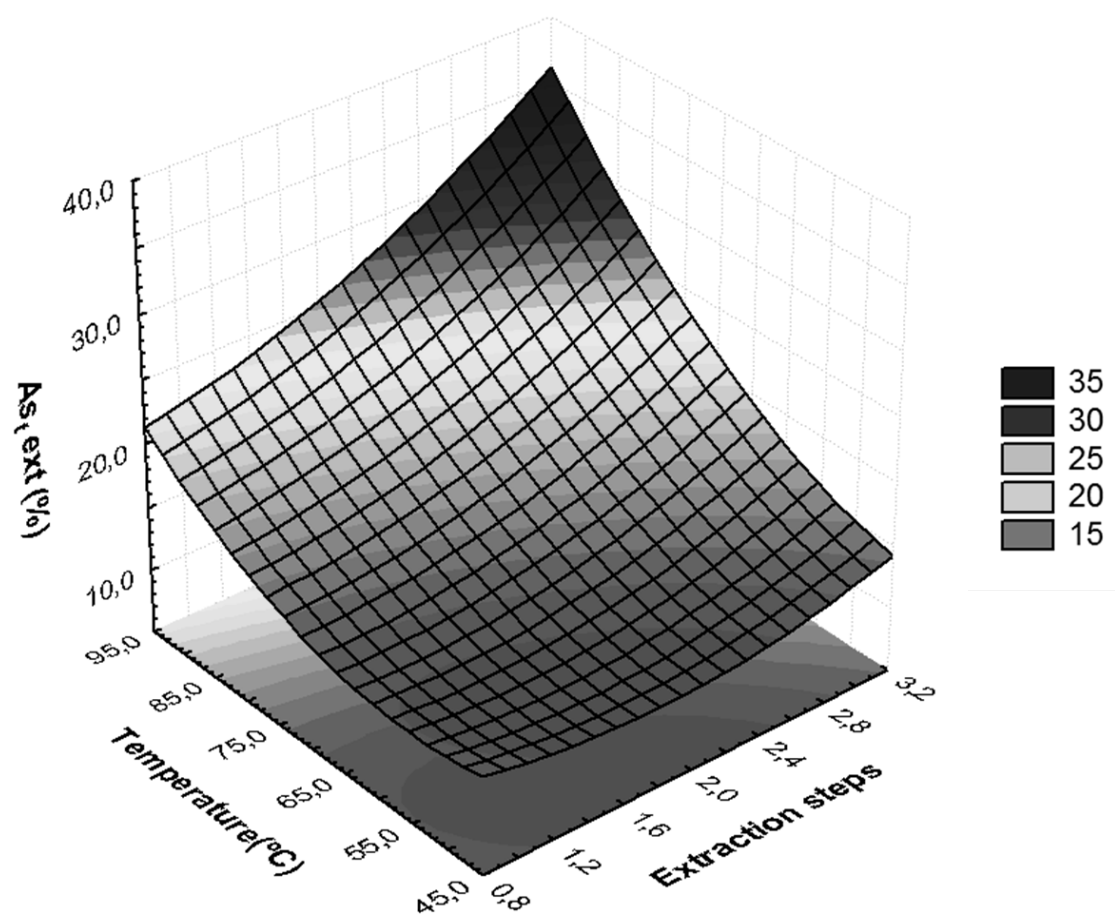

Figure S1B

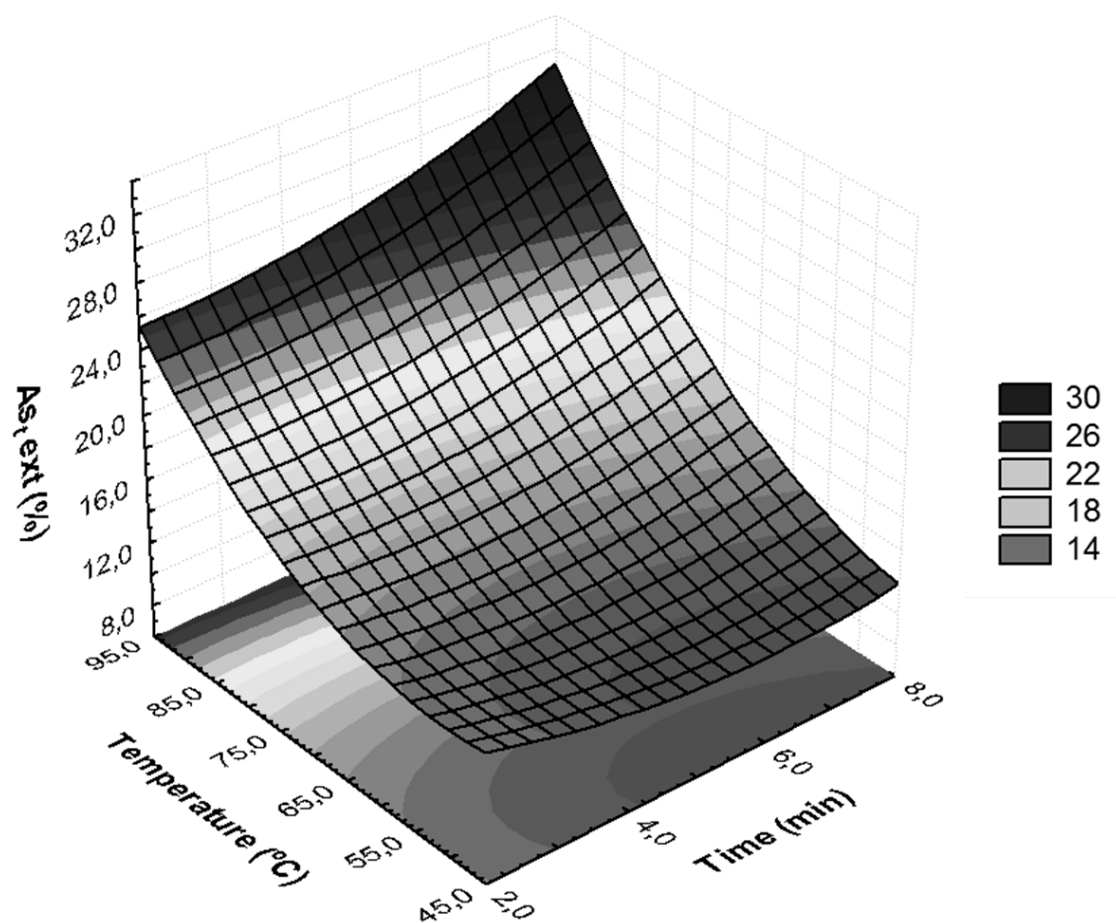

19  
20

Figure S1C
